# Supplementary material for: SARS-Cov-2 Spike Protein Mutation at Cysteine-488 Impairs Its Golgi Localization And Intracellular S1/S2 Processing
Source: Preprints.org preprint supplement (doi:10.20944/preprints202210.0245.v1), 2022-10-18
Supplement: Supplementary file 9 [file supplementary]

Archive with 9 entries (8 files):
- Supplemental Figure legends.pdf
- __MACOSX/
- __MACOSX/._Supplemental Figure legends.pdf
- Supplemental Figures S1.pdf
- __MACOSX/._Supplemental Figures S1.pdf
- Supplemental Figures S3.pdf
- __MACOSX/._Supplemental Figures S3.pdf
- Supplemental Figures S2.pdf
- __MACOSX/._Supplemental Figures S2.pdf
