# Supplementary figures and images for: SARS-Cov-2 Spike Protein Mutation at Cysteine-488 Impairs Its Golgi Localization And Intracellular S1/S2 Processing
Source: Preprints.org preprint supplement (doi:10.20944/preprints202210.0245.v1), 2022-10-18

Supplemental figure S3

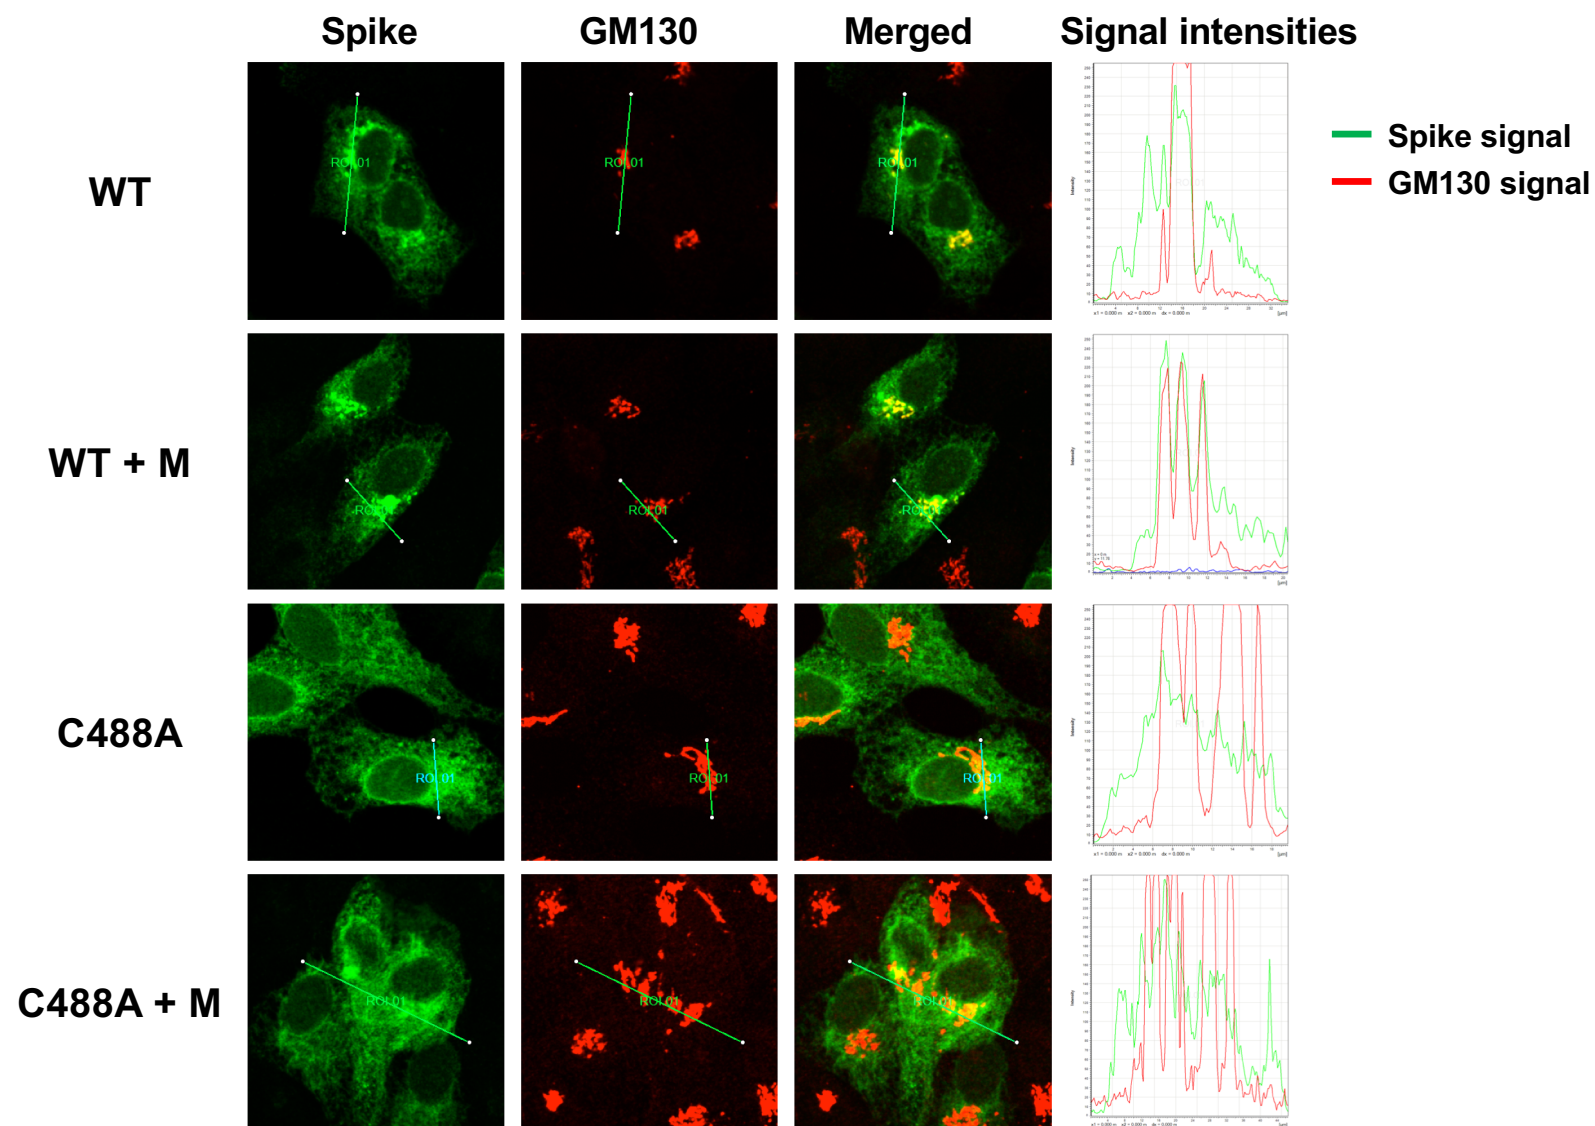

Supplement: Supplementary file 1 [file supplementary]

NCI-H522/hACE2-DYK

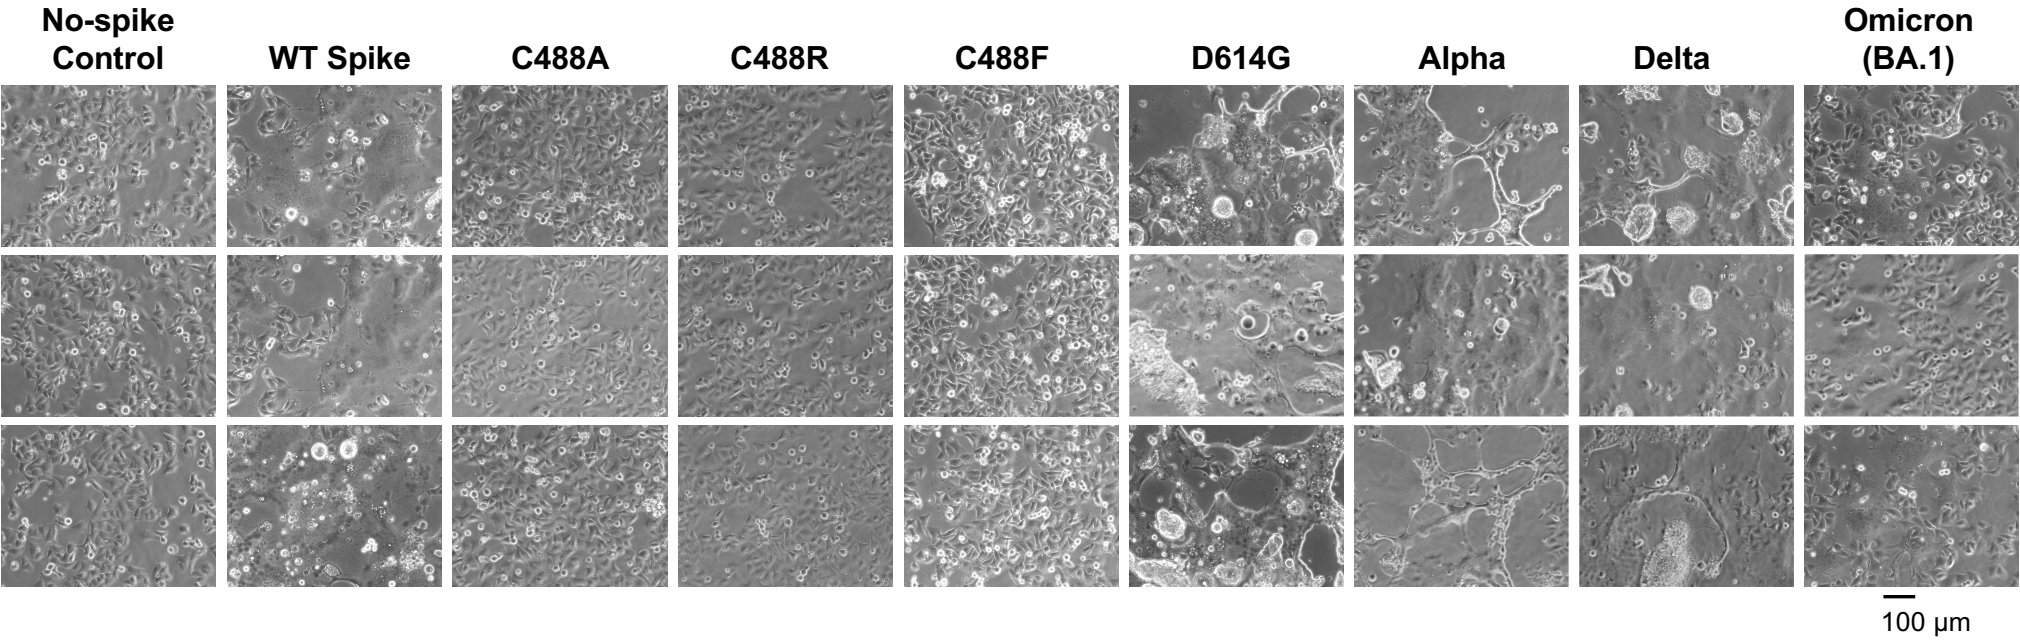

Supplement: Supplementary file 5 [file supplementary]

**A**

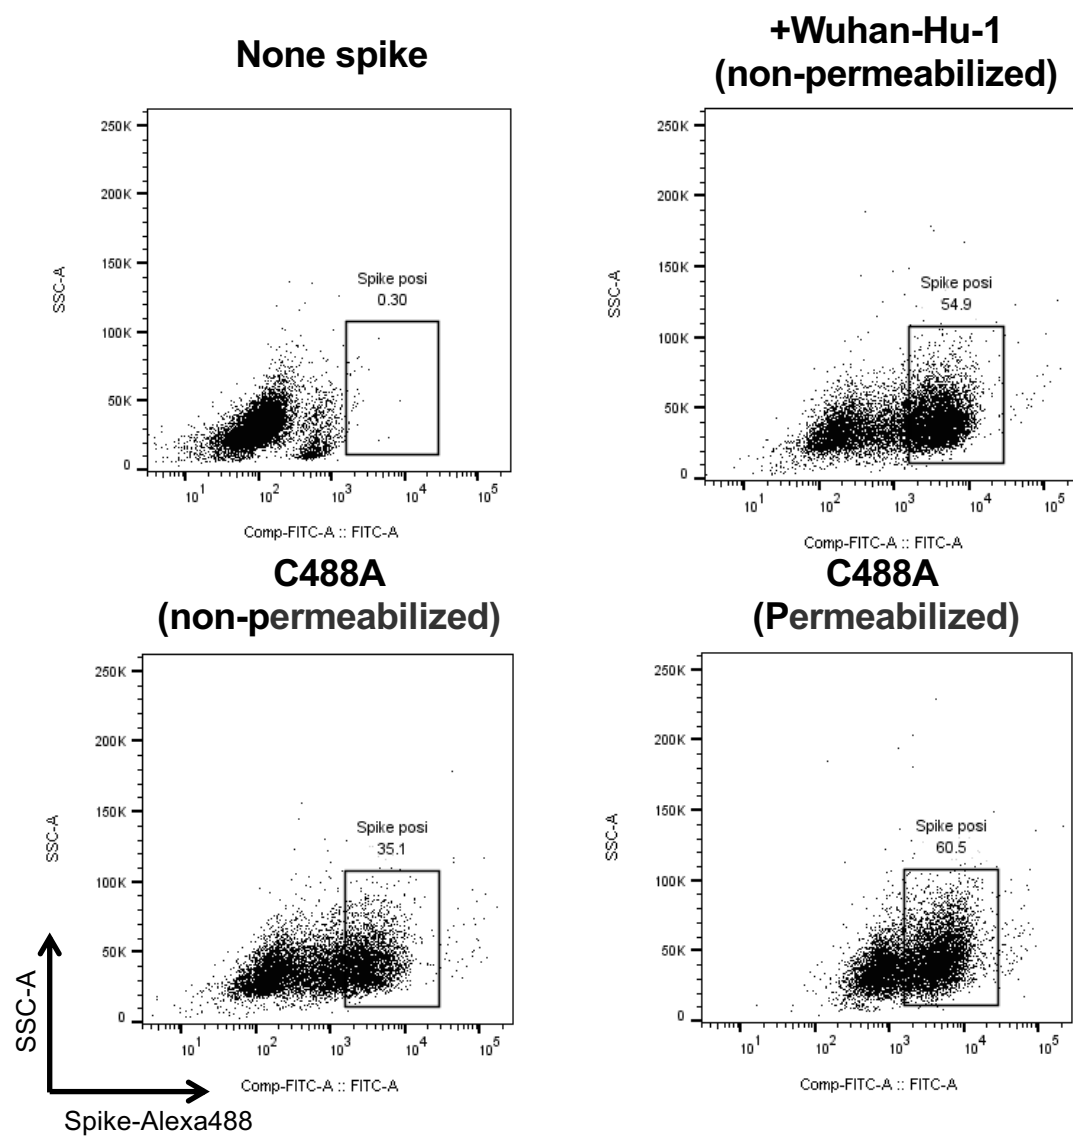

**B**

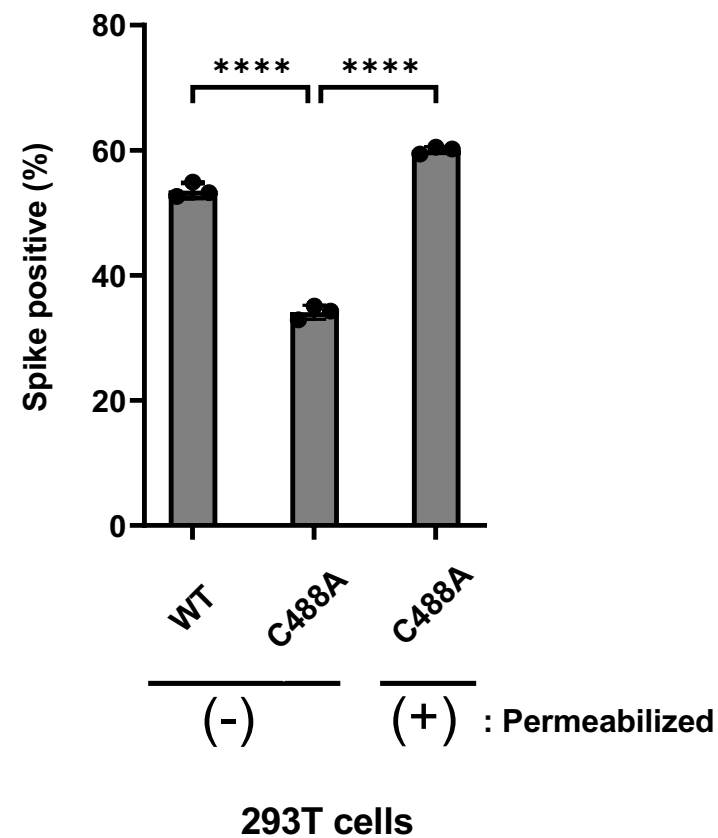

Supplement: Supplementary file 6 [file supplementary]
